# Supplementary material for: Alternative Functional rad21 Paralogs in Fusarium oxysporum
Source: Front Microbiol. 2019 Jun 18;10:1370. doi: 10.3389/fmicb.2019.01370 (PMC6591460; doi:10.3389/fmicb.2019.01370)
Supplement: TABLE S2 — Primers used in the study. [file Table_2.XLSX]

## Sheet: Sordariomycetes
N. crassa	DDR	Fusarium_oxysporum_lycopersici	Fusarium_fujikuroi	Fusarium_graminearum	Fusarium_proliferatum	Fusarium_verticillioides	Magnaporthe_oryzae	Fusarium solani	Stachybotrys_chartarum	Stachybotrys_chlorohalonata	Trichoderma_gamsii	Trichoderma_reesei
NCU10044T0	APN1	rBBH (XP_018231579.1)	rBBH (KLO82062.1)	rBBH (ESU06654.1)	rBBH (CZR35287.1)	rBBH (EWG38207.1)	rBBH (EHA58094.1)	rBBH (EEU47648.1)	rBBH (KFA79640.1)	rBBH (KFA64672.1)	rBBH (KUE96655.1)	rBBH (ETS01674.1)
NCU01961T1	APN2	rBBH (XP_018237892.1)		rBBH (ESU14393.1)							rBBH (KUE97294.1)
NCU02806T0	BMH1	rBBH (XP_018235168.1)	rBBH (KLO89980.1)	rBBH (ESU12993.1)	rBBH (CZR39895.1)	*rBBH (EWG43847.1)	rBBH (EHA54760.1)	rBBH (EEU46010.1)	rBBH (KFA73165.1)	rBBH (KFA61484.1)	rBBH (KUE99890.1)	rBBH (ETS03943.1)
NCU01067T0	CCL1 (Cyclin H)	rBBH (XP_018239225.1)	rBBH (KLO90216.1)	rBBH (ESU07519.1)	rBBH (CZR46145.1)	rBBH (EWG47542.1)	rBBH (EHA57793.1)	rBBH (EEU41975.1)	rBBH (KFA74237.1)	rBBH (KFA60216.1)	rBBH (KUF03022.1)	rBBH (ETR97593.1)
NCU06481T0	CDC9 (LIG1)	rBBH (XP_018246712.1)	rBBH (KLO88407.1)	rBBH (ESU11415.1)	rBBH (CZR41216.1)	rBBH (EWG46696.1)	rBBH (EHA50885.1)	rBBH (EEU43085.1)	rBBH (KFA74247.1)	rBBH (KFA63462.1)	rBBH (KUE98589.1)	rBBH (ETS00266.1)
NCU08346T1	CHK1	rBBH (XP_018249293.1)	rBBH (KLO86744.1)		rBBH (CZR35452.1)		rBBH (EHA49832.1)	rBBH (EEU43942.1)	rBBH (KFA78029.1)	rBBH (KFA62098.1)	rBBH (KUE99557.1)
NCU01858T0	CSM3	rBBH (XP_018255978.1)	rBBH (KLO94402.1)	rBBH (ESU10537.1)	rBBH (CZR49180.1)	rBBH (EWG55018.1)	rBBH (EHA46593.1)	rBBH (EEU35278.1)	rBBH (KFA71817.1)	rBBH (KFA63368.1)	rBBH (KUE98549.1)	rBBH (ETS03327.1)
NCU00272T0	Cul4	rBBH (XP_018246588.1)	rBBH (KLO88336.1)	rBBH (ESU11491.1)	rBBH (CZR41142.1)	rBBH (EWG46510.1)	rBBH (EHA54131.1)	rBBH (EEU43246.1)	rBBH (KFA75166.1)	rBBH (KFA67469.1)	rBBH (KUF04156.1)	rBBH (ETR99178.1)
NCU06605T0	DDB1	rBBH (XP_018245242.1)	rBBH (KLO95880.1)	rBBH (ESU11187.1)	rBBH (CZR37129.1)	rBBH (EWG45425.1)	rBBH (EHA52810.1)	rBBH (EEU40193.1)	rBBH (KFA77928.1)	rBBH (KFA65202.1)	rBBH (KUF05110.1)	rBBH (ETS04622.1)
NCU05292T0	DDI1	*rBBH (XP_018245398.1)	rBBH (KLO95973.1)	rBBH (ESU12220.1)	rBBH (CZR37227.1)	*rBBH (EWG45276.1)	NO_HIT	NO_HIT	rBBH (KFA71981.1)	rBBH (KFA67695.1)	rBBH (KUE99783.1)	rBBH (ETR97791.1)
NCU04749T0	DNA2	rBBH (XP_018241913.1)	rBBH (KLO85496.1)	rBBH (ESU16107.1)	rBBH (CZR36596.1)	rBBH (EWG42134.1)	rBBH (EHA56676.1)	rBBH (EEU40478.1)	rBBH (KFA77162.1)	rBBH (KFA63576.1)	rBBH (KUF05157.1)	rBBH (ETS04587.1)
NCU09503T0	DPB11	rBBH (XP_018247924.1)	rBBH (KLO86909.1)	rBBH (ESU08202.1)	rBBH (CZR46885.1)	rBBH (EWG49442.1)	rBBH (EHA52741.1)	rBBH (EEU39071.1)	rBBH (KFA77508.1)	rBBH (KFA66008.1)	rBBH (KUE99048.1)	rBBH (ETS03663.1)
NCU10893T0	DUT1	rBBH (XP_018232207.1)	rBBH (KLO87444.1)	rBBH (ESU06154.1)	rBBH (CZR34978.1)	rBBH (EWG37643.1)	rBBH (EHA48957.1)	rBBH (EEU47784.1)	NO_HIT	NO_HIT	NO_HIT	rBBH (ETS04384.1)
NCU09500T0	ELG1	rBBH (XP_018247912.1)	rBBH (KLO86904.1)	rBBH (ESU08209.1)	rBBH (CZR46877.1)	rBBH (EWG49425.1)	rBBH (EHA52753.1)	rBBH (EEU39481.1)	rBBH (KFA77506.1)	rBBH (KFA64524.1)	rBBH (KUE99041.1)	rBBH (ETS03658.1)
NCU06089T0	EXO1 (DIN7 par)	rBBH (XP_018234739.1)	rBBH (KLO80062.1)	rBBH (ESU13229.1)	rBBH (CZR39675.1)	rBBH (EWG48321.1)	rBBH (EHA48554.1)	rBBH (EEU45949.1)	rBBH (KFA75818.1)	rBBH (KFA62064.1)	rBBH (KUE96756.1)	rBBH (ETS02391.1)
NCU06572T0	HNT3	rBBH (XP_018234528.1)	rBBH (KLO79950.1)	NO_HIT	rBBH (CZR39559.1)	rBBH (EWG48124.1)	rBBH (EHA55431.1)	rBBH (EEU44295.1)	NO_HIT	NO_HIT	rBBH (KUE96606.1)	rBBH (ETS06160.1)
NCU04826T0	HOP2	*rBBH (XP_018241603.1)	rBBH (KLO85979.1)	rBBH (ESU15768.1)	rBBH (CZR36412.1)	rBBH (EWG41891.1)	rBBH (EHA47121.1)	rBBH (EEU40533.1)	rBBH (KFA74885.1)	rBBH (KFA67936.1)	rBBH (KUE98399.1)	NO_HIT
NCU11300T0	HRT1 (RBX1)	rBBH (XP_018249298.1)	rBBH (KLO87108.1)	rBBH (ESU07943.1)	rBBH (CZR35449.1)	*rBBH (EWG49726.1)	rBBH (EHA47383.1)	rBBH (EEU44167.1)	rBBH (KFA78041.1)	rBBH (KFA62089.1)	rBBH (KUE99556.1)	rBBH (ETS06994.1)
NCU03659T0	KIN28 (CDK7)	rBBH (XP_018234214.1)	rBBH (KLO79758.1)	rBBH (ESU13686.1)	rBBH (CZR39357.1)	rBBH (EWG47816.1)	rBBH (EHA51586.1)	rBBH (EEU44254.1)	rBBH (KFA75473.1)	rBBH (KFA60943.1)	rBBH (KUE98171.1)	rBBH (ETR97935.1)
NCU00077T0	Ku70	rBBH (XP_018235621.1)	rBBH (KLO89744.1)	rBBH (ESU12851.1)	rBBH (CZR40138.1)	rBBH (EWG44265.1)	rBBH (EHA53989.1)	rBBH (EEU46616.1)	rBBH (KFA79536.1)	rBBH (KFA62665.1)	rBBH (KUE98897.1)	rBBH (ETS05635.1)
NCU08290T0	Ku80	rBBH (XP_018242217.1)	rBBH (KLO85322.1)	rBBH (ESU11255.1)	rBBH (CZR36785.1)	rBBH (EWG42427.1)	rBBH (EHA54678.1)		rBBH (KFA77209.1)	rBBH (KFA62463.1)	rBBH (KUF00127.1)	rBBH (ETS02014.1)
NCU06264T0	lig 4	*rBBH (XP_018249697.1)	rBBH (KLO79549.1)	rBBH (ESU08977.1)	rBBH (CZR47572.1)	rBBH (EWG51338.1)	rBBH (EHA53001.1)	rBBH (EEU39116.1)	rBBH (KFA71683.1)	rBBH (KFA64555.1)	rBBH (KUE98062.1)	rBBH (ETS03876.1)
NCU08938T0	MAG1	rBBH (XP_018240486.1)	rBBH (KLO94261.1)	rBBH (ESU16762.1)	rBBH (CZR43153.1)	*rBBH (EWG40412.1)	rBBH (EHA52268.1)	rBBH (EEU45145.1)	rBBH (KFA77066.1)	rBBH (KFA64694.1)	rBBH (KUF03497.1)	rBBH (ETR98781.1)
NCU03820T0	MEC3	rBBH (XP_018243852.1)	rBBH (KLO91366.1)	rBBH (ESU11150.1)	rBBH (CZR38654.1)	*rBBH (EWG43385.1)	rBBH (EHA47412.1)	rBBH (EEU44820.1)	rBBH (KFA77806.1)	rBBH (KFA62134.1)	rBBH (KUE95841.1)	rBBH (ETS03068.1)
NCU00964T0	MET18	rBBH (XP_018246421.1)	rBBH (KLO88256.1)	rBBH (ESU11582.1)	rBBH (CZR41059.1)	rBBH (EWG46365.1)	rBBH (EHA53624.1)	rBBH (EEU43200.1)	NO_HIT	rBBH (KFA62817.1)	rBBH (KUE96822.1)	rBBH (ETS00243.1)
NCU11088T0	MGT1	rBBH (XP_018248968.1)	rBBH (KLO86534.1)	rBBH (ESU07033.1)	rBBH (CZR35666.1)	rBBH (EWG50626.1)	rBBH (EHA48559.1)	rBBH (EEU43845.1)	rBBH (KFA72000.1)	rBBH (KFA66971.1)	rBBH (KUE96160.1)	rBBH (ETR97132.1)
NCU08309T0	MLH1	rBBH (XP_018245048.1)	rBBH (KLO95764.1)	rBBH (ESU16342.1)	rBBH (CZR37010.1)	*rBBH (EWG45607.1)	rBBH (EHA55504.1)	rBBH (EEU40295.1)	rBBH (KFA74225.1)	rBBH (KFA63562.1)	rBBH (KUE99698.1)	rBBH (ETS05489.1)
NCU09373T0	MLH2	rBBH (XP_018231989.1)	rBBH (KLO87552.1)	rBBH (ESU06449.1)	rBBH (CZR35090.1)	NO_HIT	rBBH (EHA58264.1)	rBBH (EEU48453.1)	rBBH (KFA74834.1)	rBBH (KFA64122.1)	rBBH (KUE96936.1)	rBBH (ETS01318.1)
NCU05385T0	MLH3	rBBH (XP_018249081.1)	rBBH (KLO86606.1)	rBBH (ESU06952.1)	rBBH (CZR35593.1)	rBBH (EWG50514.1)	rBBH (EHA50358.1)	rBBH (EEU44091.1)	rBBH (KFA74692.1)	rBBH (KFA70309.1)	rBBH (KUF01572.1)	rBBH (ETS02205.1)
NCU10477T0	MMS2	rBBH (XP_018241509.1)	rBBH (KLO85910.1)	rBBH (ESU15848.1)	rBBH (CZR36338.1)	rBBH (EWG41790.1)	rBBH (EHA53349.1)	rBBH (EEU41076.1)	rBBH (KFA76252.1)	rBBH (KFA61065.1)	rBBH (KUF02803.1)	rBBH (ETS00375.1)
NCU08730T0	MRE11	rBBH (XP_018248989.1)	rBBH (KLO86543.1)	rBBH (ESU07044.1)	rBBH (CZR35656.1)	rBBH (EWG50608.1)	rBBH (EHA52379.1)	rBBH (EEU43849.1)	rBBH (KFA79224.1)	rBBH (KFA69441.1)	rBBH (KUE96233.1)	rBBH (ETR97482.1)
NCU02230T0	MSH2	rBBH (XP_018244018.1)	rBBH (KLO91478.1)	rBBH (ESU12411.1)	rBBH (CZR38533.1)	rBBH (EWG43599.1)	rBBH (EHA48506.1)	rBBH (EEU45809.1)	rBBH (KFA72895.1)	rBBH (KFA66863.1)	rBBH (KUF03675.1)	rBBH (ETS02600.1)
NCU08115T0	MSH3	rBBH (XP_018234593.1)	rBBH (KLO79985.1)	rBBH (ESU13307.1)	rBBH (CZR39595.1)	rBBH (EWG48193.1)	rBBH (EHA57344.1)	rBBH (EEU46429.1)	rBBH (KFA78380.1)	rBBH (KFA62554.1)	rBBH (KUE99840.1)	rBBH (ETS04016.1)
NCU08135T0	MSH6	rBBH (XP_018255386.1)	rBBH (KLO92246.1)	rBBH (ESU13821.1)	rBBH (CZR48556.1)	*rBBH (EWG54550.1)	rBBH (EHA48718.1)	rBBH (EEU38173.1)	rBBH (KFA73173.1)	rBBH (KFA63003.1)	rBBH (KUF02489.1)	rBBH (ETS07124.1)
NCU07457T0	mus81	rBBH (XP_018232074.1)	rBBH (KLO87521.1)	rBBH (ESU06414.1)	rBBH (CZR35058.1)	rBBH (EWG37765.1)	rBBH (EHA53802.1)	rBBH (EEU47749.1)	rBBH (KFA72935.1)	rBBH (KFA64385.1)	rBBH (KUF02082.1)	rBBH (ETR99012.1)
NCU06654T0	NTG1	rBBH (XP_018240272.1)	rBBH (KLO88813.1)	rBBH (ESU16886.1)	rBBH (CZR43279.1)	rBBH (EWG40593.1)	rBBH (EHA52054.1)	rBBH (EEU45483.1)	rBBH (KFA75025.1)	rBBH (KFA64969.1)	rBBH (KUE99448.1)	rBBH (ETS01087.1)
NCU03040T0	OGG1	rBBH (XP_018234731.1)	rBBH (KLO80055.1)	rBBH (ESU13237.1)	rBBH (CZR39668.1)	*rBBH (EWG48313.1)	rBBH (EHA49152.1)	rBBH (EEU45951.1)	rBBH (KFA72441.1)	rBBH (KFA66461.1)	rBBH (KUF01758.1)	rBBH (ETS05839.1)
NCU08626T0	PHR1	rBBH (XP_018233708.1)	rBBH (KLO79128.1)	rBBH (ESU06025.1)	rBBH (CZR33498.1)	rBBH (EWG36289.1)	rBBH (EHA56940.1)	rBBH (EEU48146.1)	rBBH (KFA71840.1)	rBBH (KFA64466.1)	rBBH (KUE99496.1)	rBBH (ETS06932.1)
NCU08020T0	PMS1	rBBH (XP_018238798.1)	rBBH (KLO80514.1)	rBBH (ESU07295.1)	rBBH (CZR46454.1)	rBBH (EWG47101.1)	rBBH (EHA54906.1)	rBBH (EEU34176.1)	rBBH (KFA73587.1)	rBBH (KFA61542.1)	rBBH (KUE94986.1)	rBBH (ETR96904.1)
NCU06757T0	POL ι	*rBBH (XP_018243951.1)	rBBH (KLO91431.1)	rBBH (ESU12361.1)	rBBH (CZR38585.1)	rBBH (EWG43524.1)	rBBH (EHA48262.1)	rBBH (EEU45832.1)	rBBH (KFA71659.1)	rBBH (KFA66152.1)	rBBH (KUE97873.1)	rBBH (ETS06550.1)
NCU02457T0	Pol κ	rBBH (XP_018249454.1)	rBBH (KLO86210.1)	rBBH (ESU06718.1)	rBBH (CZR35357.1)	rBBH (EWG50177.1)	rBBH (EHA55650.1)	rBBH (EEU44207.1)	rBBH (KFA74098.1)	rBBH (KFA65588.1)	rBBH (KUF02416.1)	rBBH (ETS07041.1)
NCU04548T0	POL2 (POL ε)	rBBH (XP_018243558.1)	rBBH (KLO91174.1)	rBBH (ESU12111.1)	rBBH (CZR38851.1)	rBBH (EWG43068.1)	rBBH (EHA47674.1)	rBBH (EEU45924.1)	rBBH (KFA75829.1)	rBBH (KFA62068.1)	rBBH (KUE96786.1)	rBBH (ETS02423.1)
NCU01192T0	POL3 (POL δ)	rBBH (XP_018234467.1)	rBBH (KLO79917.1)	rBBH (ESU13388.1)	rBBH (CZR39523.1)	rBBH (EWG48060.1)	rBBH (EHA55217.1)	rBBH (EEU44688.1)	rBBH (KFA78561.1)	rBBH (KFA63216.1)	rBBH (KUE97494.1)	rBBH (ETS00049.1)
NCU09239T0	POL30 (PCNA)	*rBBH (XP_018232216.1)	rBBH (KLO87442.1)	rBBH (ESU06324.1)	rBBH (CZR34976.1)	rBBH (EWG37638.1)	rBBH (EHA48955.1)	rBBH (EEU48498.1)	rBBH (KFA73138.1)	rBBH (KFA66309.1)	rBBH (KUF01897.1)	rBBH (ETS04386.1)
NCU07440T0	RAD1	rBBH (XP_018237045.1)	rBBH (KLO84051.1)	rBBH (ESU14659.1)	rBBH (CZR42350.1)	rBBH (EWG38971.1)	rBBH (EHA46194.1)	rBBH (EEU47481.1)	rBBH (KFA77334.1)	rBBH (KFA64014.1)	rBBH (KUE97339.1)	rBBH (ETR97832.1)
NCU07066T0	RAD10	rBBH (XP_018241563.1)	rBBH (KLO85949.1)	rBBH (ESU15807.1)	rBBH (CZR36381.1)	rBBH (EWG41849.1)	rBBH (EHA48366.1)	rBBH (EEU41099.1)	rBBH (KFA75772.1)	rBBH (KFA60497.1)	rBBH (KUE98378.1)	rBBH (ETS04309.1)
NCU08742T0	RAD14	rBBH (XP_018249014.1)	rBBH (KLO86552.1)	rBBH (ESU07006.1)	rBBH (CZR35648.1)	rBBH (EWG50597.1)	rBBH (EHA52290.1)	rBBH (EEU43880.1)	rBBH (KFA74704.1)	rBBH (KFA70321.1)	rBBH (KUE94905.1)	rBBH (ETR97547.1)
NCU01625T0	RAD15 (RAD3 in S. cerevisiae)	rBBH (XP_018253417.1)	rBBH (KLO96812.1)	rBBH (ESU08822.1)	rBBH (CZR48470.1)	rBBH (EWG52716.1)	rBBH (EHA50547.1)	rBBH (EEU42759.1)	rBBH (KFA73679.1)	rBBH (KFA62369.1)	rBBH (KUF04554.1)	rBBH (ETR96978.1)
NCU03650T0	RAD16	rBBH (XP_018243311.1)	rBBH (KLO96643.1)	rBBH (ESU11937.1)	rBBH (CZR39021.1)	rBBH (EWG42803.1)	rBBH (EHA57160.1)	rBBH (EEU44892.1)	rBBH (KFA73758.1)	rBBH (KFA62893.1)	rBBH (KUE97419.1)	rBBH (ETS02980.1)
NCU16423T0	RAD17	rBBH (XP_018233778.1)	rBBH (KLO84968.1)	rBBH (ESU05442.1)	rBBH (CZR33400.1)	rBBH (EWG36226.1)	rBBH (EHA49889.1)	rBBH (EEU48878.1)	rBBH (KFA72267.1)	rBBH (KFA60206.1)	rBBH (KUF05495.1)	rBBH (ETS00606.1)
NCU05210T0	RAD18	rBBH (XP_018249534.1)	rBBH (KLO96565.1)	rBBH (ESU08863.1)		rBBH (EWG51502.1)	rBBH (EHA47283.1)	rBBH (EEU39325.1)	rBBH (KFA75609.1)	rBBH (KFA62750.1)	rBBH (KUE95303.1)	rBBH (ETS05155.1)
NCU07498T0	RAD2	rBBH (XP_018233234.1)	rBBH (KLO79409.1)	rBBH (ESU06151.1)	rBBH (CZR34144.1)	rBBH (EWG36781.1)	rBBH (EHA49388.1)	rBBH (EEU48761.1)	rBBH (KFA73092.1)	rBBH (KFA63033.1)	rBBH (KUF01095.1)	rBBH (ETS00908.1)
NCU07542T0	RAD23	rBBH (XP_018235320.1)	rBBH (KLO89903.1)	rBBH (ESU12909.1)	rBBH (CZR39978.1)	rBBH (EWG43995.1)	rBBH (EHA54835.1)	rBBH (EEU46538.1)	rBBH (KFA80200.1)	rBBH (KFA63013.1)	rBBH (KUF03285.1)	rBBH (ETS06379.1)
NCU00517T0	RAD24	rBBH (XP_018232364.1)	rBBH (KLO87356.1)	rBBH (ESU06227.1)	rBBH (CZR34890.1)	rBBH (EWG37502.1)	rBBH (EHA53884.1)	rBBH (EEU47822.1)	rBBH (KFA78172.1)	rBBH (KFA63182.1)	NO_HIT	rBBH (ETS04475.1)
NCU07837T0	RAD26 (ERCC-6, CSA)	rBBH (XP_018248368.1)	rBBH (KLO87156.1)	rBBH (ESU07992.1)	rBBH (CZR47138.1)	rBBH (EWG49839.1)	rBBH (EHA52986.1)	rBBH (EEU39557.1)		rBBH (KFA65421.1)	rBBH (KUE95515.1)	rBBH (ETS01637.1)
NCU10776T0	RAD27	rBBH (XP_018251109.1)	rBBH (KLO93355.1)	rBBH (ESU17991.1)	rBBH (CZR41395.1)	rBBH (EWG52852.1)	rBBH (EHA50200.1)	rBBH (EEU42493.1)	rBBH (KFA79066.1)	rBBH (KFA67023.1)	rBBH (KUE96289.1)	rBBH (ETS02478.1)
NCU03764T0	RAD28 (ERCC-8, CSB)	rBBH (XP_018240676.1)	rBBH (KLO89910.1)	rBBH (ESU12968.1)	rBBH (CZR39922.1)	rBBH (EWG43889.1)	rBBH (EHA56642.1)	rBBH (EEU44342.1)	rBBH (KFA76346.1)	rBBH (KFA68204.1)	rBBH (KUF01550.1)	rBBH (ETR99970.1)
NCU01936T0	RAD30	rBBH (XP_018237948.1)	rBBH (KLO84559.1)	rBBH (ESU14362.1)	rBBH (CZR41837.1)	rBBH (EWG39850.1)	rBBH (EHA46051.1)	rBBH (EEU47599.1)	rBBH (KFA75371.1)	rBBH (KFA65664.1)	rBBH (KUE97584.1)	rBBH (ETS03467.1)
NCU12087T0	RAD4	rBBH (XP_018237622.1)	rBBH (KLO84356.1)	rBBH (ESU14980.1)	rBBH (CZR42043.1)	rBBH (EWG39539.1)	rBBH (EHA47129.1)	rBBH (EEU47274.1)	rBBH (KFA75677.1)	rBBH (KFA65274.1)	rBBH (KUE99091.1)	rBBH (ETS02273.1)
NCU00901T0	RAD50	rBBH (XP_018233541.1)	rBBH (KLO79222.1)	rBBH (ESU05930.1)	rBBH (CZR33703.1)	rBBH (EWG36443.1)	rBBH (EHA53763.1)	rBBH (EEU48106.1)	rBBH (KFA79161.1)	rBBH (KFA63889.1)	rBBH (KUF01014.1)	tblstn(KI911150.1)
NCU02741T0	RAD51	rBBH (XP_018232030.1)	rBBH (KLO87544.1)	rBBH (ESU06440.1)	rBBH (CZR35081.1)	rBBH (EWG37799.1)	rBBH (EHA53954.1)	NO_HIT	rBBH (KFA74816.1)	rBBH (KFA64197.1)	rBBH (KUE96946.1)	tblstn(KI911149.1)
NCU04275T0	rad52	rBBH (XP_018240369.1)	rBBH (KLO95522.1)	rBBH (ESU16836.1)	rBBH (CZR43226.1)	rBBH (EWG40512.1)	rBBH (EHA49792.1)	rBBH (EEU45507.1)		rBBH (KFA63287.1)	rBBH (KUE99383.1)	rBBH (ETS01151.1)
FOXG_01680T0	RAD53	rBBH (XP_018234571.1)	rBBH (KLO79974.1)	rBBH (ESU13320.1)	rBBH (CZR39585.1)	*rBBH (EWG48163.1)	rBBH (EHA54768.1)	rBBH (EEU45983.1)	rBBH (KFA72591.1)	rBBH (KFA60584.1)		rBBH (ETS04005.1)
NCU02348T0	RAD54	rBBH (XP_018238055.1)	rBBH (KLO82823.1)	rBBH (ESU14301.1)	rBBH (CZR38429.1)	rBBH (EWG53815.1)	rBBH (EHA50047.1)	rBBH (EEU35043.1)	rBBH (KFA79153.1)	rBBH (KFA60262.1)	rBBH (KUF03579.1)	rBBH (ETS02689.1)
NCU08806T0	rad55	rBBH (XP_018245073.1)	rBBH (KLO95776.1)	rBBH (ESU16330.1)	rBBH (CZR37025.1)	rBBH (EWG45585.1)	rBBH (EHA54621.1)	rBBH (EEU40287.1)	rBBH (KFA75081.1)	rBBH (KFA67741.1)	rBBH (KUE98464.1)	rBBH (ETS05465.1)
NCU01771T0	rad57	rBBH (XP_018233103.1)	rBBH (KLO79455.1)	rBBH (ESU06079.1)	rBBH (CZR34254.1)	rBBH (EWG36852.1)	rBBH (EHA57124.1)	tblstn(GG698896.1)	rBBH (KFA74651.1)	rBBH (KFA61140.1)	rBBH (KUE97535.1)	NO_HIT
NCU03649T0	RAD7	rBBH (XP_018243309.1)	rBBH (KLO96642.1)	rBBH (ESU11938.1)	rBBH (CZR39022.1)	rBBH (EWG42802.1)	rBBH (EHA57161.1)	rBBH (EEU44490.1)	rBBH (KFA73743.1)	rBBH (KFA62865.1)	rBBH (KUE97420.1)	rBBH (ETS02981.1)
NCU08879T0	RAD9	rBBH (XP_018243816.1)	rBBH (KLO91338.1)	rBBH (ESU11120.1)	rBBH (CZR38682.1)	rBBH (EWG43350.1)	rBBH (EHA55237.1)	rBBH (EEU44452.1)	rBBH (KFA77824.1)	rBBH (KFA60975.1)	rBBH (KUF01423.1)	rBBH (ETS03036.1)
NCU02053T0	REV1	rBBH (XP_018232259.1)	rBBH (KLO87423.1)	rBBH (ESU06304.1)	rBBH (CZR34956.1)	rBBH (EWG37598.1)	rBBH (EHA48993.1)	rBBH (EEU47789.1)	rBBH (KFA71322.1)	rBBH (KFA66252.1)	rBBH (KUF01916.1)	rBBH (ETS04407.1)
NCU01951T0	REV3	rBBH (XP_018237904.1)	rBBH (KLO84539.1)	rBBH (ESU14383.1)	rBBH (CZR41858.1)	rBBH (EWG39795.1)	rBBH (EHA45970.1)	rBBH (EEU47080.1)	rBBH (KFA75353.1)	rBBH (KFA66105.1)	rBBH (KUE97287.1)	rBBH (ETS03581.1)
NCU06577T0	REV7	rBBH (XP_018245210.1)	rBBH (KLO95858.1)	rBBH (ESU11209.1)	rBBH (CZR37107.1)	rBBH (EWG45462.1)	rBBH (EHA54879.1)	rBBH (EEU40182.1)	rBBH (KFA76018.1)	rBBH (KFA65192.1)	rBBH (KUF04893.1)	rBBH (ETS04779.1)
NCU03606T0	RFA1	rBBH (XP_018240424.1)	rBBH (KLO94291.1)	rBBH (ESU16798.1)	rBBH (CZR43185.1)	rBBH (EWG40464.1)	rBBH (EHA48740.1)	rBBH (EEU45135.1)	rBBH (KFA75618.1)	rBBH (KFA66423.1)	rBBH (KUF00438.1)	rBBH (ETR99877.1)
NCU07717T0	RFA2	*rBBH (XP_018245061.1)	rBBH (KLO95768.1)	rBBH (ESU16338.1)	rBBH (CZR37017.1)	rBBH (EWG45597.1)	rBBH (EHA55510.1)	rBBH (EEU40862.1)	rBBH (KFA75105.1)	rBBH (KFA67689.1)	rBBH (KUE98480.1)	rBBH (ETS05486.1)
NCU06767T0	RFC1	*rBBH (XP_018233011.1)	rBBH (KLO96422.1)	rBBH (ESU05491.1)	rBBH (CZR34404.1)	rBBH (EWG36932.1)	rBBH (EHA50460.1)	rBBH (EEU47959.1)	rBBH (KFA71670.1)	rBBH (KFA66146.1)	rBBH (KUE97856.1)	rBBH (ETS06422.1)
NCU08598T0	SGS1	rBBH (XP_018232511.1)	rBBH (KLO96193.1)	rBBH (ESU05747.1)	rBBH (CZR34806.1)	rBBH (EWG37381.1)	rBBH (EHA57987.1)	rBBH (EEU34847.1)	rBBH (KFA73322.1)	rBBH (KFA70426.1)	rBBH (KUF02727.1)	rBBH (ETS06246.1)
NCU08628T0	SLX4	*rBBH (XP_018233714.1)	rBBH (KLO79126.1)	rBBH (ESU06027.1)	rBBH (CZR33495.1)	rBBH (EWG36286.1)	rBBH (EHA56942.1)	rBBH (EEU48150.1)	rBBH (KFA71842.1)	rBBH (KFA64476.1)	rBBH (KUE99494.1)	rBBH (ETS06930.1)
NCU04733T0	srs2	rBBH (XP_018237166.1)	rBBH (KLO84109.1)	rBBH (ESU14946.1)	rBBH (CZR42288.1)	rBBH (EWG39078.1)	rBBH (EHA48805.1)	rBBH (EEU46890.1)	rBBH (KFA70832.1)	rBBH (KFA65702.1)	rBBH (KUF00572.1)	tblstn(KI911151.1)
NCU06438T0	SSL2 (ERCC-3)	rBBH (XP_018235480.1)	rBBH (KLO89828.1)	rBBH (ESU13514.1)	rBBH (CZR40054.1)	*rBBH (EWG44124.1)	rBBH (EHA50775.1)	rBBH (EEU46123.1)	rBBH (KFA81479.1)	rBBH (KFA68753.1)	rBBH (KUE99606.1)	rBBH (ETS05547.1)
NCU02098T0	TDG	rBBH (XP_018233163.1)	rBBH (KLO79373.1)	rBBH (ESU06115.1)	rBBH (CZR34054.1)	rBBH (EWG36733.1)	rBBH (EHA48747.1)	rBBH (EEU48777.1)	rBBH (KFA73123.1)	rBBH (KFA65509.1)	rBBH (KUE95706.1)	rBBH (ETS00672.1)
NCU06345T0	TDP1	rBBH (XP_018245379.1)	rBBH (KLO95961.1)	rBBH (ESU12235.1)	rBBH (CZR37215.1)	rBBH (EWG45295.1)	rBBH (EHA52251.1)	NO_HIT	rBBH (KFA72733.1)	rBBH (KFA67671.1)	rBBH (KUE99795.1)	NO_HIT
NCU00274T0	TEL1	rBBH (XP_018246590.1)	rBBH (KLO88337.1)	rBBH (ESU11490.1)	rBBH (CZR41143.1)	rBBH (EWG46511.1)	rBBH (EHA54132.1)	rBBH (EEU43247.1)	rBBH (KFA75156.1)	rBBH (KFA67449.1)	rBBH (KUF04155.1)	rBBH (ETR99180.1)
NCU05423T0	TFB1	*rBBH (XP_018253381.1)	rBBH (KLO96827.1)	rBBH (ESU08808.1)	rBBH (CZR48454.1)	*rBBH (EWG52687.1)	rBBH (EHA50479.1)	rBBH (EEU42566.1)	rBBH (KFA73696.1)	rBBH (KFA61750.1)	rBBH (KUE96904.1)	rBBH (ETS00075.1)
NCU01831T0	TFB2 (SSL1)	rBBH (XP_018243446.1)	rBBH (KLO91111.1)	rBBH (ESU12045.1)	rBBH (CZR38914.1)	rBBH (EWG42964.1)	rBBH (EHA56786.1)	rBBH (EEU46337.1)	rBBH (KFA81877.1)	rBBH (KFA63739.1)	rBBH (KUE99336.1)	rBBH (ETS01557.1)
NCU01580T0	TFB3	rBBH (XP_018251239.1)	rBBH (KLO93285.1)	rBBH (ESU17905.1)	rBBH (CZR41470.1)	rBBH (EWG52999.1)	rBBH (EHA47635.1)	rBBH (EEU42269.1)	rBBH (KFA78923.1)	rBBH (KFA67104.1)	rBBH (KUF02142.1)	rBBH (ETR98934.1)
NCU05523T0	TFB4	rBBH (XP_018236716.1)	rBBH (KLO83874.1)	rBBH (ESU15069.1)	rBBH (CZR42535.1)	rBBH (EWG38647.1)	rBBH (EHA49095.1)	rBBH (EEU46735.1)	rBBH (KFA80771.1)	rBBH (KFA68603.1)	rBBH (KUE99055.1)	rBBH (ETS02346.1)
NCU07482T0	UNG1	rBBH (XP_018233240.1)	rBBH (KLO79411.1)	rBBH (ESU06161.1)	rBBH (CZR34149.1)	rBBH (EWG36785.1)	rBBH (EHA49939.1)	rBBH (EEU48757.1)	rBBH (KFA78451.1)	rBBH (KFA63027.1)	rBBH (KUF01080.1)	rBBH (ETS00900.1)
NCU08850T0	UVDE	rBBH (XP_018246071.1)	rBBH (KLO88008.1)	rBBH (ESU15492.1)	rBBH (CZR40797.1)	rBBH (EWG46050.1)	rBBH (EHA52485.1)	rBBH (EEU41394.1)	rBBH (KFA79867.1)	rBBH (KFA64235.1)	rBBH (KUE97125.1)	rBBH (ETS02926.1)
NCU06585T0	XPC	rBBH (XP_018245219.1)	rBBH (KLO95863.1)	rBBH (ESU11204.1)	rBBH (CZR37112.1)	rBBH (EWG45450.1)	rBBH (EHA54886.1)	rBBH (EEU40752.1)	rBBH (KFA76015.1)	rBBH (KFA65201.1)	rBBH (KUF04896.1)	rBBH (ETS04783.1)
NCU08637T0	XRCC4	*rBBH (XP_018233707.1)	rBBH (KLO79129.1)	rBBH (ESU06024.1)	rBBH (CZR33500.1)	*rBBH (EWG36291.1)	rBBH (EHA55072.1)	rBBH (EEU48856.1)	rBBH (KFA71849.1)	rBBH (KFA64377.1)	rBBH (KUE99497.1)	rBBH (ETS06933.1)
NCU03564T0	Yen1	*rBBH (XP_018253232.1)	rBBH (KLO80715.1)	rBBH (ESU08721.1)	rBBH (CZR48367.1)	*rBBH (EWG52552.1)	rBBH (EHA55000.1)	rBBH (EEU42618.1)	rBBH (KFA79733.1)	rBBH (KFA61227.1)	rBBH (KUE98603.1)	rBBH (ETS00279.1)

## Sheet: Eurotiomycetes
A. nidulans	DDR
CBF75032.1	APN1
CBF76897.1	APN2
CBF77379.1	BMH1
CBF86391.1	CCL1 (Cyclin H)
CBF70249.1	CDC9 (LIG1)
CBF81802.1	CHK1
CBF79336.1	CSM3
CBF90329.1	Cul4
CBF89158.1	DDB1
CBF71367.1	DDI1
CBF75685.1	DNA2
CBF71683.1	DPB11
CBF89841.1	DUT1
CBF78770.1	ELG1
CBF83526.1	EXO1 (DIN7 par)
CBF86257.1	HNT3
CBF82688.1	HOP2
CBF82857.1	HRT1 (RBX1)
CBF74278.1	KIN28 (CDK7)
CBF77271.1	Ku70
CBF80039.1	Ku80
CBF90206.1	lig 4
CBF77626.1	MAG1
CBF71104.1	MEC3
CBF85050.1	MET18
CBF77199.1	MGT1
CBF90147.1	MLH1
CBF85120.1	MLH2
CBF77674.1	MLH3
CBF75708.1	MMS2
CBF89239.1	MRE11
CBF76294.1	MSH2
CBF75474.1	MSH3
CBF85409.1	MSH6
CBF83374.1	mus81
CBF79828.1	NTG1
CBF71239.1	OGG1
CBF89585.1	PHR1
CBF69717.1	PMS1
CBF81536.1	POL ι
CBF82838.1	Pol κ
CBF83469.1	POL2 (POL ε)
CBF78614.1	POL3 (POL δ)
CBF89532.1	POL30 (PCNA)
CBF78182.1	RAD1
CBF77745.1	RAD10
CBF75392.1	RAD14
CBF74347.1	RAD16
CBF75758.1	RAD17
CBF78646.1	RAD18
CBF81100.1	RAD2
CBF86570.1	RAD23
CBF84756.1	RAD24
CBF79076.1	RAD26 (ERCC-6, CSA)
CBF84062.1	RAD27
CBF81138.1	RAD28 (ERCC-8, CSB)
CBF88902.1	RAD3
CBF77016.1	RAD30
CBF75160.1	RAD4
CBF75760.1	RAD50
CBF87878.1	RAD51
CBF77590.1	rad52
XP_661883.1	RAD53
CBF81736.1	RAD54
CBF71341.1	rad55
CBF88254.1	rad57
CBF74349.1	RAD7
CBF74219.1	RAD9
CBF75115.1	REV1
CBF76778.1	REV3
CBF86297.1	REV7
CBF79351.1	RFA1
CBF89190.1	RFA2
CBF69746.1	RFC1
CBF86151.1	SGS1
CBF77366.1	SLX4
CBF75362.1	srs2
CBF74098.1	SSL2 (ERCC-3)
CBF81831.1	TDG
CBF70601.1	TDP1
CBF90326.1	TEL1
CBF81647.1	TFB1
CBF74326.1	TFB2 (SSL1)
CBF90125.1	TFB3
CBF79257.1	TFB4
CBF79376.1	UNG1
CBF89145.1	UVDE
CBF70012.1	XPC
CBF77341.1	XRCC4
CBF83236.1	Yen1
